1 **An integrative structural model of the full-length gp16 ATPase in bacteriophage phi29**  
2 **DNA packaging motor**

3

4 **Abdullah F.U.H. Saeed<sup>#1,2,3</sup>, Chun Chan<sup>#4</sup>, Hongxin Guan<sup>1,2</sup>, Bing Gong<sup>5</sup>, Peixuan**  
5 **Guo<sup>\*4,6</sup>, Xiaolin Cheng<sup>\*4,7</sup>, Songying Ouyang<sup>\*1,2</sup>**

6

7

8 <sup>1</sup>The Key Laboratory of Innate Immune Biology of Fujian Province, Provincial University  
9 Key Laboratory of Cellular Stress Response and Metabolic Regulation, Biomedical Research  
10 Center of South China, Key Laboratory of OptoElectronic Science and Technology for  
11 Medicine of Ministry of Education, College of Life Sciences, Fujian Normal University,  
12 Fuzhou, 350117, China;

13 <sup>2</sup>Laboratory for Marine Biology and Biotechnology, Pilot National Laboratory for Marine  
14 Science and Technology (Qingdao), Qingdao 266237, China;

15 <sup>3</sup>College of Chemistry and Materials Science, Fujian Normal University, Fuzhou 350117,  
16 China;

17 <sup>4</sup>College of Pharmacy, The Ohio State University, Columbus, OH, USA;

18 <sup>5</sup>Guangxi Key Laboratory of Marine Disaster in the Beibu Gulf, Beibu Gulf University,  
19 Qinzhou, 535000, China;

20 <sup>6</sup>Center for RNA Nanobiotechnology and Nanomedicine; College of Medicine; Dorothy M.  
21 Davis Heart and Lung Research Institute; Comprehensive Cancer Center, The Ohio State  
22 University, Columbus, OH, USA;

23 <sup>7</sup>Biophysics Graduate Program; Translational Data Analytics Institute, The Ohio State  
24 University, Columbus, OH, USA.

25

26 **Keywords: DNA packaging motor, ATPase, crystallography, integrative modeling**

27

28 #Both authors contributed equally.

29

30 \*Correspondence: Xiaolin Cheng (cheng.1302@osu.edu), Peixuan Guo (guo.1091@osu.edu),  
31 Songying Ouyang (ouyangsy@fjnu.edu.cn)

32

33

1 **ABSTRACT**

2

3 Biological motors, ubiquitous in living systems, convert chemical energy into  
4 different kinds of mechanical motions critical to cellular functions. Most of these biomotors  
5 belong to a group of enzymes known as ATPases, which adopt a multi-subunit ring-shaped  
6 structure and hydrolyze adenosine triphosphate (ATP) to generate forces. The gene product  
7 gp16, an ATPase in bacteriophage  $\phi$ 29, is among the most powerful biomotors known.  
8 It can overcome substantial resisting forces from entropic, electrostatic, and DNA bending  
9 sources to package double-stranded DNA (dsDNA) into a preformed protein shell (procapsid).  
10 Despite numerous studies of the  $\phi$ 29 packaging mechanism, a structure of the full-length  
11 gp16 is still lacking, let alone that of the packaging motor complex that includes two  
12 additional molecular components: a connector gp10 protein and a prohead RNA (pRNA).  
13 Here we report the crystal structure of the C-terminal domain of gp16 (gp16-CTD).  
14 Structure-based alignment of gp16-CTD with related RNase H-like nuclease domains  
15 revealed a nucleic acid binding surface in gp16-CTD, whereas no nuclease activity has been  
16 detected for gp16. Subsequent molecular dynamics (MD) simulations showed that this  
17 nucleic acid binding surface is likely essential for pRNA binding. Furthermore, our  
18 simulations of a full-length gp16 structural model highlighted a dynamic interplay between  
19 the N-terminal domain (NTD) and CTD of gp16, which may play a role in driving DNA  
20 movement into the procapsid, providing structural support to the previously proposed  
21 inchworm model. Lastly, we assembled an atomic structural model of the complete  $\phi$ 29  
22 dsDNA packaging motor complex by integrating structural and experimental data from  
23 multiple sources. Collectively, our findings provided a refined inchworm-revolution model  
24 for dsDNA translocation in bacteriophage  $\phi$ 29 and suggested how the individual domains of  
25 gp16 work together to power such translocation.

26

1 **ABSTRACT (SHORT)**

2

3

4 Biological motors, ubiquitous in living systems, convert chemical energy into  
5 different kinds of mechanical motions critical to cellular functions. The gene product 16  
6 (gp16) in bacteriophage  $\phi$ 29 is among the most powerful biomotors known, which adopts a  
7 multi-subunit ring-shaped structure and hydrolyzes ATP to package double-stranded DNA  
8 (dsDNA) into a preformed procapsid. Here we report the crystal structure of the C-terminal  
9 domain of gp16 (gp16-CTD). Structure-based alignment and molecular dynamics (MD)  
10 simulations revealed an essential binding surface of gp16-CTD for prohead RNA (pRNA), a  
11 unique component of the motor complex. Furthermore, our simulations highlighted a  
12 dynamic interplay between the N-terminal domain (NTD) and CTD of gp16, which may play  
13 a role in driving DNA movement into the procapsid. Lastly, we assembled an atomic  
14 structural model of the complete  $\phi$ 29 dsDNA packaging motor complex by integrating  
15 structural and experimental data from multiple sources. Collectively, our findings provided a  
16 refined inchworm-revolution model for dsDNA translocation in bacteriophage  $\phi$ 29 and  
17 suggested how the individual domains of gp16 work together to power such translocation.

17

1

## 2 **Introduction**

3

4 During the late stage in morphogenesis, double-stranded DNA (dsDNA) viruses  
5 package their genomes into a preformed protein shell (procapsid). Genome encapsidation is  
6 an extremely unfavorable process, both entropically and enthalpically, which is accomplished  
7 by a viral DNA packaging motor. In 1986, this DNA packaging motor (also known as gene  
8 product 16, gp16) was first reported to be an ATPase <sup>1</sup> that hydrolyzes ATP to drive DNA  
9 packaging. Titration assays using a thin-layer chromatography for radiative ATP  
10 quantification concluded that one molecule of ATP was consumed to package every 2 DNA  
11 base pairs <sup>1</sup>. A subsequent study showed that ATP hydrolysis by gp16 was both prohead and  
12 DNA-gp3 dependent <sup>2</sup>. The same study also identified the ATP-binding (Walker residues <sup>3</sup>)  
13 and potential magnesium-binding domains in gp16, which were also present in other phage  
14 packaging motors, such as gpA of  $\lambda$ , gp19 of T7 and gp17 of T4.

15 ATPase gp16, residing at a unique vertex of the viral shell, belongs to a class of  
16 ubiquitous ring-shaped nucleoside triphosphate (NTP)-dependent molecular motors. These  
17 motors are powerful enough to package DNA against extremely high internal pressure (tens  
18 of atmospheres) established by densely packed negatively charged DNA inside the shell. As  
19 such, there have been extensive efforts in engineering viral packaging motors as a functional  
20 nanodevice for the delivery of nucleic acid therapeutics. Among the various motors,  
21 bacteriophage  $\phi$ 29 has been developed into a highly efficient *in vitro* system <sup>1</sup> and therefore  
22 served as an excellent model system for structural and mechanistic studies of biomotors <sup>4</sup> as  
23 well as nanotechnological development <sup>5,6</sup>.

24 Viral packaging motors can be classified into two distinct families: the terminase  
25 family and the HerA/FtsK-type ATPases. Although all known dsDNA packaging ATPases  
26 belong to the P-loop NTPase fold under the ASCE (additional strand conserved E (glutamate))  
27 division, sequence and structural analyses were able to distinguish bacteriophage  $\phi$ 29 from  
28 the terminase-family viruses and place it as a divergent version of the HerA/FtsK superfamily  
29 <sup>7</sup>. A number of viral packaging motor structures have been resolved, namely the large  
30 terminase (TerL) proteins, of the terminase family, such as bacteriophage T4 gp17 <sup>8</sup>, Sf6 gp2  
31 <sup>9</sup>, D6E TerL protein <sup>10</sup>, thermophilic phage P74-26 TerL <sup>11,12</sup>, and herpesvirus herpes simplex  
32 virus 1 (HSV1) pUL15 <sup>13</sup>. The TerL proteins are the catalytic engine of DNA packaging  
33 motors, which harbor two enzymatic functionalities: an adenosine triphosphatase (ATPase)  
34 that consumes ATP to translocate DNA, and an endonuclease that cleaves genome

1 concatemers at both initiation and termination steps of packaging. By contrast,  $\phi$ 29 lacks the  
2 cleavage (nuclease) functionality and packages its unit-length genome covalently attached by  
3 a recognition protein<sup>1,14</sup>. The gp16 structure has proven to be extremely challenging to  
4 resolve. Only until very recently, Mao *et al.* reported an X-ray crystallographic structure of  
5 the N-terminal domain (ATPase domain) of gp16 and a pseudo-atomic structure of the  
6 functional motor complex that also included the connector protein and the prohead RNA  
7 (pRNA) besides gp16 by docking the various component structures into low-resolution (12  $\square$ )  
8 cryo-EM maps<sup>4</sup>.

9 Partially due to a limited atomistic view of the viral packaging motor proteins, the  
10 oligomeric state of the individual motor components has been debated for decades. The  
11 debate initiated in the stoichiometry of pRNA, which is a unique component of the  $\phi$ 29  
12 packaging motor complex<sup>15</sup>. While early biochemical assays supported a hexameric ring  
13 structure of pRNA<sup>16,17</sup>, Cao *et al.* later confirmed this result but also showed an alternative  
14 pentameric pRNA ring structure from asymmetric reconstruction of the cryo-EM data<sup>18,19</sup>.  
15 More recent cryo-EM data have also favored a pentameric structure<sup>4,20</sup>. The same mystery  
16 carried over to the gp16 ATPase where low-resolution cryo-EM reconstructions slightly  
17 favored 5-fold symmetry averaged structures<sup>21–23</sup>, whereas a large body of biochemical data  
18 supported a hexameric ring structure<sup>16,24,25</sup>. Similarly in bacteriophage T4 and T7, atomic  
19 structures of the packaging motor proteins seemed to fit both 5- and 6-fold symmetry  
20 averaged low-resolution (16–32  $\square$ ) cryo-EM densities<sup>8,26</sup>. All these controversies are rooted  
21 in the lack of a high-resolution structure of the  $\phi$ 29 packaging motor complex. Recently,  
22 Yang *et al.* have determined the first atomic structures of a herpesvirus terminase complex in  
23 both apo and ATP mimic-bound states and provided a reconciling structural view of this class  
24 of viral dsDNA packaging motors<sup>13</sup>.

25 The  $\phi$ 29 gp16 ATPase is a 39-kDa 332-amino-acid protein consisting of two domains  
26 connected by a flexible linker. The N-terminal domain (gp16-NTD, residues 1–208) is  
27 approximately 200 amino acid long and contains the conserved ASCE ATPase domain. The  
28 C-terminal domain (gp16-CTD, residues 228–332) contains about 100 residues, but little is  
29 known about its function. The X-ray crystallographic structure of gp16-NTD (residues 4–197)  
30 has been determined previously<sup>4</sup>. However, crystallization of the  $\phi$ 29 full-length gp16 (FL-  
31 gp16) has been difficult, so an atomic structure of FL-gp16 is still lacking, leaving a  
32 knowledge gap of how the two domains are spatially organized and interact with each other  
33 as well as the pRNA and the connector. Here, we reported an X-ray crystallographic structure  
34 of gp16-CTD at 2.3 Å resolution. By aligning this structure to those of its counterparts in the

1 TerL complexes, we identified possible pRNA or DNA binding surfaces of gp16-CTD. The  
2 availability of an atomic structure of gp16-CTD together with existing structural information  
3 of the other motor components has also enabled us to build the first atomic structural model  
4 of FL-gp16. Our molecular dynamics (MD) simulations of FL-gp16 further highlighted that  
5 the two domains are free to translate and reorient relative to each other, resulting in a wide  
6 range of conformations. We finally employed an integrative structural modeling strategy and  
7 MD simulations to assemble a pseudo-atomic model of the  $\phi$ 29 packaging motor complex,  
8 shedding light on a critical coordinative role of gp16-CTD in motor assembly and operation,  
9 and the mechanisms by which the ring-shaped ATPases translocate their substrates.  
10

## 1 **Results and discussion**

2

### 3 **Structure of the $\phi$ 29 gp16 C-terminal domain**

4

5 The gp16-CTD structure displays a compressed football shape with dimensions of 18  
6 Å × 20 Å × 12 Å. A central five-stranded  $\beta$  sheet ( $\beta$ 1- $\beta$ 5), with mixed parallel and antiparallel  
7 strands, is flanked on one side by two  $\alpha$  helices through hydrophobic interactions (Figure  
8 1A). An extended Loop 1 (L1) that connects  $\beta$ 3 and  $\beta$ 4 covers the other side of the  $\beta$  sheet by  
9 crossing over the  $\beta$ 1 and  $\beta$ 2 strands. The strand order in the central sheet is 4, 1, 2, 3, and 5.  
10 On one lateral edge of the central  $\beta$ -sheet, Loop 2 (L2), formed between  $\beta$ 4 and  $\alpha$ 1, holds a  
11 twisted  $\beta$ -hairpin. On the other edge,  $\beta$ 3,  $\beta$ 5, and the N-terminal part of  $\alpha$ 2 surround a cleft  
12 that typically harbors the conserved active site residues (dotted circle in Figure 1A) in the  
13 RNase H/resolvase/integrase superfamily enzymes.

14 The gp16-CTD structure resembles the RNase H fold, with the greatest similarity to  
15 RNase H1 (Figure 1B). This topological feature is conserved among all CTDs of the  
16 packaging ATPases in bacteriophages and herpesviruses. Despite low sequence identity (<  
17 15%), the central  $\beta$ -sheet of gp16-CTD superimposes well its counterparts in other terminase  
18 large subunits (TerL), such as T4 gp17, SPP1 gp2 and HSV1 pUL15 (Figure S1).  
19 Interestingly, although no nuclease activity of gp16-CTD has been reported to date,  
20 conserved RNases H acidic residues D265 and D314 are found on one edge of the central  $\beta$ -  
21 sheet where two parallel  $\beta$ -strands ( $\beta$ 3 and  $\beta$ 5) orient in a fork-like manner (Figure 1B). D265  
22 is located at the end of  $\beta$ 3 while D314 at the end of  $\beta$ 5, forming a small electronegative site  
23 (Site I) on the protein surface (Figure 1C). Conventionally, three conserved acidic residues  
24 constitute the active center in the RNase H family of nucleases; for example, they are three  
25 aspartic acid residues in RNase H<sup>27,28</sup>. A two-metal-ion mechanism was proposed for the  
26 catalytic function of this family of nucleases<sup>29</sup>. Two metal ions ( $Mg^{2+}$  or  $Mn^{2+}$ ) were found  
27 to be coordinated by the three conserved acidic residues in the structure of RNase H  
28 complexed with an RNA/DNA hybrid<sup>27</sup>. These acidic residues are structurally conserved  
29 among the RNase H-like nuclease domains in other phages as well, such as T4 gp17<sup>8</sup>.  
30 However, superimposition of gp16-CTD onto the RNase H shows that the third catalytic  
31 aspartic acid is replaced by an asparagine in gp16-CTD (Figure 1B). Although the two  
32 aspartic acids are conserved, the lack of the third Asp may account for its deficiency in  
33 nuclease activity. The retention of this mysterious catalytic site is a clear example of  
34 divergent evolution, but the new role of this heritage site and the evolution of its role adapted

1 to its motor functional requirement remain elusive.

2

### 3 **Nucleic acid binding surfaces on gp16-CTD**

4

5 Despite the conservation of the overall topology and the active site residues, there is  
6 very little sequence conservation in the RNase H-like domains between bacteriophages and  
7 herpesviruses. This lack of conservation suggests that different viruses package their  
8 genomes differently. We hypothesized that although the  $\phi$ 29 DNA packaging ATPase is  
9 shown not to possess the nuclease activity, the RNase H-like structure may still be preserved  
10 and adapted for nucleic acid binding. Nevertheless, due to the low sequence homology,  
11 determining how gp16-CTD interacts with various types of nucleic acids, such as pRNA or  
12 dsDNA substrate, has been particularly challenging.

13 Similar to its counterparts in other RNase H-like nuclease domains, Site I of gp16-  
14 CTD constitutes a shallow groove, with its edge lined by positively charged residues, K233,  
15 R234, K236, K239, H268, R312, and R319. The groove bottom is formed by  $\beta$ 2 and  $\beta$ 3,  
16 which contribute a tryptophan W254 and a tyrosine Y263, respectively, to make stacking  
17 interactions with nucleic acid bases (Figure 2A). The N-terminus of gp16-CTD, which  
18 contains three nearly consecutive basic residues K233, R234, and K236, divides the site into  
19 a major and a minor binding grooves (colored in yellow and magenta, respectively in Figure  
20 2B). To explore the conformational dynamics of Site I, we performed MD simulations of  
21 gp16-CTD in aqueous solution. The root-mean-square-fluctuation (RMSF) profile indicates  
22 that the N-terminus (residues 228-238) of gp16-CTD is relatively rigid, in agreement with the  
23 low B-factor values for this region in the crystallographic structure (Figure S2). The rigid N-  
24 terminus excludes the possibility of forming a larger binding surface by large displacements  
25 of the N-terminus via thermal fluctuation. The solvent-accessible surface areas (SASAs) of  
26 both the major and minor binding grooves are invariant throughout the MD simulations  
27 (Figure S3), implying the importance of the basic patch K233, R234, and K236 for nucleic  
28 acid binding.

29 To uncover how Site I may accommodate nucleic acids, we compared the gp16-CTD  
30 structure to those of several distantly related nucleases bound with substrates, which  
31 suggested two possible DNA binding orientations in the groove. First, superposition of the  
32 RNase H/RNA-DNA structure with gp16-CTD placed the DNA helix on the gp16-CTD  
33 surface, extending from the N-terminus of the gp16-CTD to the C-terminal end of L1 (Figure



1 2C). We designate this orientation as the vertical orientation. In contrast, superposition with a  
2 very recent structure of the *Thermus thermophilus* RuvC/Holiday junction complex placed the  
3 DNA helix in an orthogonal orientation, denoted as the horizontal orientation (Figure 2D).  
4 Similar DNA orientations were identified for TerL of thermophilic phage P74-26 also by  
5 superposition with RNase H and RuvC<sup>12</sup>. However, we note a crucial difference between the  
6 two comparisons. In P74-26, a  $\beta$ -hairpin in the viral TerL proteins clashed with the vertically  
7 placed DNA helix, whereas this  $\beta$ -hairpin is absent in gp16-CTD and all other known  
8 members of the RNase H family<sup>28,30,31</sup>. On the other hand, the L1 loop (residue 266-274) in  
9 gp16-CTD is significantly shorter than the  $\beta$ -hairpin in the TerL proteins, possibly because a  
10 flexible  $\beta$ -hairpin that plays an auto-regulatory role in nuclease function is not required by  
11 gp16-CTD. Our MD simulations confirmed that L1 has negligible flexibility and would  
12 minimally interfere with the DNA binding surface of gp16-CTD (Figure S2). Thus, no  
13 clashes were found for either vertical or horizontal binding of DNA on gp16-CTD.  
14 Furthermore, a positively charged N-terminus of gp16-CTD can insert into the DNA major  
15 groove, stabilizing DNA binding in both vertical and horizontal orientations. These results  
16 suggest that gp16-CTD may have multiple nucleic acid binding modes. Importantly, our  
17 identified nucleic acid binding surfaces on gp16-CTD are not limited to DNA. Instead, gp16-  
18 CTD may also interact with pRNA through these surfaces, which could shed light on the  
19 essential roles of pRNA in motor assembly and operation<sup>15</sup>.

20 Besides Site I, gp16-CTD contains another surface site enriched in positively charged  
21 residues, hereafter denoted as Site II. This site is mainly formed by two basic patches near the  
22 N-terminus of helix  $\alpha 1$  and the C-terminus of helix  $\alpha 2$  (Figure S4). Our MD simulations  
23 showed that despite the favorable electrostatic interactions, L2 sandwiched between the two  
24 basic patches is highly flexible, consistent with the large B-factors observed in the  
25 crystallographic structure (Figure S2). The highly dynamic L2 can kinetically weaken the  
26 interaction of nucleic acids with gp16-CTD, making Site II a likely transient site for substrate  
27 binding.

28

### 29 **The linker domain connecting NTD and CTD of gp16**

30

31 The NTD and CTD domains of gp16 are connected by a linker domain that may play  
32 an important role in mediating the domain interactions and thus shaping the structure and  
33 function of the entire gp16 motor. Additionally, the linker appears to make direct contact  
34 with helix  $\alpha 2$  that constitutes the nucleic acid binding Site I in gp16-CTD. Thus, the linker

1 may also be involved in interacting with pRNA or DNA substrate during packaging. The  
2 structure of the gp16 linker domain (residues 198-227) was not resolved in either previous  
3 gp16-NTD structure <sup>4</sup> or our current gp16-CTD structure. The gp16 linker is significantly  
4 shorter, with only 30 residues as compared to 90-150 residues in other viral ATPases. In T4  
5 gp17, the linker was identified as a subdomain of NTD and made extensive interactions with  
6 the substrate DNA <sup>8</sup>. In phage Sf6 gp2, the linker together with the nuclease domain formed  
7 the DNA binding surface <sup>9</sup>.

8 We performed MD simulations on the gp16 linker domain starting from an extended  
9 chain conformation. The results showed that the linker domain remained as a flexible chain  
10 lacking a secondary structure throughout the simulation, in agreement with the secondary  
11 structure prediction using PsiPred <sup>32</sup> (Figure S5). Given that electron densities of both NTD  
12 and CTD were resolved in the cryo-EM data <sup>4</sup>, the linker domain is believed to occupy the  
13 space between the two domains, but its electron density map is blurred due to its high  
14 flexibility. This inherent disordered nature of the linker also explains why it was difficult to  
15 resolve the structure in crystallography or cryo-EM.

16

### 17 **Dynamic interactions between NTD and CTD of gp16**

18

19 To begin understanding the roles of the individual gp16 domains in genome  
20 packaging, we have used an integrative structural modeling approach to build an atomic  
21 structure of the full-length gp16 (FL-gp16). A key challenge in building an FL-gp16  
22 structural model is to determine the relative position and orientation of the two terminal  
23 domains. To do this, we first compared gp16-NTD to the ATPase domains of other viral  
24 motor proteins. Gp16-NTD displays a canonical ASCE fold commonly found in ATPases  
25 such as F1-ATPase <sup>33</sup>, DNA/RNA helicases or translocases <sup>34-36</sup>, and viral packaging motors  
26 <sup>4,7,26,37</sup>. Like other members of the family, the gp16-NTD core contains a five-stranded,  
27 parallel  $\beta$ -sheet sandwiched between four  $\alpha$ -helices. The structure of gp16-NTD closely  
28 resembles that of the TerL ATPase domain <sup>4</sup>. However, based on the location of the putative  
29 arginine finger (R146) and the lack of nuclease function in gp16-CTD, gp16 was also  
30 proposed to belong to the HerA/FtsK branch of the ASCE superfamily <sup>7</sup>. Despite the debate,  
31 we chose to compare gp16 with the most recently resolved cryo-EM structure of Herpes  
32 Simplex Virus (HSV1) ATPase/terminase pUL15 <sup>13</sup>. pUL15 is the only TerL protein resolved  
33 in its functional oligomeric state, whereas crystal structures of several full-length viral large  
34 terminase subunits, such as T4 gp17 and Sf6 gp2, have been available for years <sup>8,9</sup>.

1 We determined the relative orientation of gp16-NTD in a functional motor complex  
2 by comparing it to that of pUL15 with respect to its DNA substrate. To assess the feasibility  
3 of this approach, we determined the structural homology between the ATPase domains of  
4 gp16 and pUL15 by comparing gp16 to several other viral packaging ATPases (Table S1).  
5 Upon structural superposition, the ATPase domain of gp16 aligned considerably well with  
6 that of pUL15 despite their distant relation in the viral family. A homology modelled  
7 structure of gp16-NTD based on pUL15 showed a low root-mean-square-deviation (RMSD)  
8 for a large number of C $\alpha$  atoms when aligned with its crystallographic structure (PDB: 5HD9;  
9 Table S1).

10 We then explored the relative position and orientation of CTDs in several full-length  
11 monomer motor proteins by superimposing their structures using the ATPase domains as a  
12 reference (Figure 3). Interestingly, we found significant variations in both NTD-CTD  
13 separation and orientation. In pUL15, the linker occupies the space between NTD and CTD  
14 that make no contact. The catalytic site of the nuclease domain in pUL15 opens towards the  
15 adjacent subunit instead of the substrate DNA, suggesting substrate-based auto-inhibition of  
16 the nuclease activity during translocation<sup>13</sup>. By contrast, the crystallographic structures of the  
17 motor proteins T4 gp17<sup>8</sup> and Sf6 gp2<sup>12</sup> both show considerable NTD-CTD interactions. The  
18 catalytic residues on CTD are either covered by the linker domain in T4 or the adjacent  
19 subunit in Sf6, also suggesting the inaccessibility of the nuclease site to DNA during  
20 translocation. Evidently, conformational changes of CTD are required for the motor proteins  
21 to switch between a translocation and cleavage mode, but the molecular details of these  
22 conformational changes remain largely unknown. A variety of NTD-CTD separations and  
23 CTD orientations observed in recent crystal and cryo-EM structures suggest the high  
24 plasticity of the viral motor proteins, which can be partially attributed to the intrinsically  
25 disordered (unstructured) linker domain.

26 To probe the dynamic interactions between gp16-CTD and gp16-NTD, we performed  
27 MD simulations on an FL-gp16 model (Figure 4A; Movie S1) that was built by combining  
28 the crystallographic structures of gp16-CTD and gp16-NTD, and an MD-equilibrated gp16  
29 linker (details in Methodology). To avoid biasing towards the initial conformations due to  
30 insufficient sampling, we have performed eight independent simulations started from eight  
31 different FL-gp16 models with CTD in four different orientations and large separation  
32 between CTD and NTD (center-of-mass (COM) distance  $\sim 60$  Å).

33 Our MD simulations showed that a dominant population of sampled conformations  
34 has NTD-CTD COM separation of  $\sim 45$  Å in which no direct contact between the domains

1 was observed, hereafter referred to as the “extended” mode (Figure 4B). In three out of the  
2 eight trial simulations, the CTD was observed to be in touch with the NTD, hereafter referred  
3 to as the “compact” mode, and then bounce back to the extended mode. In the compact mode  
4 structure, the NTD-CTD separation is  $\sim 35$  Å (Figure 4B) and the contact surface area is  $754$   
5 Å<sup>2</sup>. The binding interface involves an amphiphilic helix  $\alpha 2$  from CTD and a short  
6 hydrophobic helix (residues 164-169) from NTD (Figure S6). The charged side of helix  $\alpha 2$   
7 faces NTD, and its electrostatic interaction with some charged residues on the NTD surface  
8 (K124 and D125) may draw the CTD towards the NTD. Upon the formation of this initial  
9 domain-domain contact, helix  $\alpha 2$  rearranges itself to bury its hydrophobic surface inside the  
10 hydrophobic region on the NTD surface composed of V162, V163, F167, L168, F169, F170  
11 and L172. A similar way of placing an amphiphilic helix in a hydrophobic environment is  
12 also found at the NTD-CTD interface of T4 gp17<sup>8</sup>, whereas the charge-charge interaction  
13 between NTD and CTD in T4 gp17 has not been confirmed. The only relevant mutagenesis  
14 study in which a Trp→Ala mutation inhibited DNA packaging and ATPase activity could  
15 provide only limited evidence for this NTD-CTD interaction<sup>8</sup>.

16 Our simulations suggest that although possible, the compact mode is energetically  
17 less favorable, consistent with its abundance in several crystallographic structures of full-  
18 length viral motor proteins. However, assembly of these structures into oligomer structures,  
19 such as Sf6 gp2, would result in considerable steric clashes between the protein and DNA or  
20 adjacent subunits (Figure 3), implying that these NTD-CTD compact models might not  
21 represent their functional states but have instead resulted from crystal packing artifacts. Thus,  
22 modeling the full-length gp16 monomer alone in the absence of the other motor components  
23 is insufficient to picture a functional motor complex.

24 We next incorporated pRNA into the FL-gp16 model and probed the dynamic  
25 interactions between gp16-CTD and gp16-NTD in the presence of pRNA. We first docked  
26 the atomic structures of gp16-NTD and pRNA into the cryo-EM density map to estimate their  
27 relative positions (Figure S7A). We note that the pRNA density would be occupied by  
28 corresponding protein components in other viral packaging motors (Figure S8), consistent  
29 with the fact that pRNA is a unique component of the  $\phi 29$  motor. We then combined the  
30 gp16-NTD/pRNA, an MD-equilibrated gp16 linker, and a randomly oriented gp16-CTD to  
31 construct a gp16/pRNA binary complex model. Similar to the gp16-only system described  
32 above, eight MD simulations were performed starting from eight gp16/pRNA models with  
33 CTD in four different orientations and CTD-NTD separation of  $\sim 60$  Å (Figure 4C; Movie S2).  
34 In the presence of pRNA, the NTD-CTD COM separation spanned 40 Å to over 60 Å during

1 the simulations due to the interactions of CTD with the pRNA backbones (Figure 4D). The  
2 distance probability distribution peaked around 45 Å, coinciding with the “extended” mode  
3 observed in the absence of pRNA. The space between the domains was occupied by the  
4 unstructured linker domain. At far separations, gp16-CTD makes contact with the three-way-  
5 junction (3WJ) of the pRNA. Several basic residues lining Site I of CTD were found engaged  
6 in stable electrostatic interactions with the negatively charged pRNA backbones (Figure 5B).  
7 We further inspected whether CTD has an orientation preference with respect to pRNA. Our  
8 simulation results showed that CTD preferably interacted with the pRNA through Site I in  
9 which both the major and minor binding grooves contributed to the binding (Figure S9). In  
10 addition, the linker domain appeared to provide the flexibility to orient CTD for optimal  
11 interaction with the pRNA. The other nucleic acid binding Site II is located on the other side  
12 of CTD facing the channel interior, but it is yet to be determined whether this second binding  
13 surface is utilized for DNA translocation.

14

### 15 **Interactions of gp16 with other motor components**

16

17 Many previous studies have hinted potential interactions between the individual  
18 components of the  $\phi$ 29 DNA packaging motor<sup>16,18,38,39</sup>, providing indirect evidence of how  
19 this motor complex assembles and operates. For example, the pRNA has been reported to  
20 bind to the N-terminus, i.e. the narrow end, of the connector<sup>25,39,40</sup>. The 5’/3’ paired helical  
21 region of pRNA was revealed to be responsible for its interaction with gp16<sup>38</sup>. However,  
22 before the determination of an atomic structure of gp16-CTD, building a complete structural  
23 model of the motor complex has been impossible, although the oligomeric states of multiple  
24 individual components have been proposed and supported by a handful of biochemical and  
25 biophysical assays<sup>16,18,37,41–43</sup>.

26 We constructed a complete structural model of the  $\phi$ 29 genome packaging motor by  
27 integrating structural and experimental data from multiple sources (Figure 5, 6A, and S7B).  
28 We incorporated the connector structure into the gp16/pRNA binary complex model by  
29 docking the most recent atomic structure of the connector<sup>20</sup> into the cryo-EM density of the  
30 motor complex<sup>4</sup> to estimate their relative positions (Figure S7C). The ternary motor complex  
31 structure was then refined using stepwise MD simulations (details in Methodology) and the  
32 RMSD of protein backbone atoms from the initial structure was within 4 Å. The integrated  
33 structural model revealed interesting findings that would not be available from the structures  
34 of the individual motor components. pRNA was reported to form a hexameric ring structure

1 through hand-in-hand interactions<sup>16</sup>. In our model, gp16-CTD resides in-between two pRNA  
2 subunits interacting simultaneously with both RNA strands (Figure 5A). While gp16-CTD  
3 could assume various orientations, the basic residues such as K301 on helix  $\alpha 1$  were found to  
4 always interact with an adjacent pRNA subunit (Figure 5C). Multiple interactions between  
5 gp16 and pRNA support the hypothesis that the pRNA ring facilitates the  $\phi 29$  motor  
6 assembly and operation by scaffolding gp16. While Site I orients towards pRNA subunits, the  
7 loop L2 between helix  $\alpha 1$  and  $\alpha 2$  extends to the interior of the motor channel. Basic residues  
8 such as K294 on L2 can bind the substrate DNA during translocation. Furthermore, the  
9 amphiphilic helix  $\alpha 2$  is also exposed to gp16-NTD, providing a structural mechanism for  
10 potential inter-domain binding observed in simulations and crystallographic structures<sup>8,12</sup>.

11 Our hexameric gp16-NTD structure was constructed based on the hexameric HSV1  
12 pUL15 ATPase ring. In addition to the previously identified DNA translocating loop  
13 containing R122 and K124<sup>4</sup>, K56 is also found situated in the interior of the motor channel  
14 (Figure 5D), suggesting that this positively charged residue may also be involved in  
15 mediating DNA interaction and translocation. The Walker residues G29, K30, S31, D118,  
16 E119, and the trans-acting arginine finger R146 are found at the interface of two adjacent  
17 gp16-NTDs, in agreement with a large body of mutagenesis and biochemical assays<sup>4,37,42,44</sup>.  
18 We note that although there is a large discrepancy in the size of the two packaging motors: a  
19 diameter of  $\sim 150$  Å for  $\phi 29$  versus  $\sim 225$  Å for HSV1, the orientation of the ATPase domain  
20 relative to the motor channel appears to be conserved in the two packaging motors. However,  
21 we cannot exclude the possibility that the gp16 ATPase ring adopts a different structure or  
22 even changes its structure (e.g., diameter) during packaging. Importantly, given the  
23 scaffolding role of pRNA, an accurate description of the size of the gp16 ATPase ring will  
24 require high-resolution structural data of pRNA, especially the A-helix that extends to the  
25 NTD. While the structure and function of the 3WJ of pRNA have been studied extensively<sup>16–</sup>  
26<sup>18,41</sup>, the A-helix of pRNA was either missing or of very low resolution in previous cryo-EM  
27 studies<sup>18,22</sup>.

28 Another important factor that may influence the gp16 ATPase ring size is the long-  
29 debated stoichiometry of pRNA. Both pentameric and hexameric pRNA oligomers have been  
30 proposed and supported by previous experimental data, and they would impose distinct  
31 constraints on the size of the ATPase ring. For the purpose of comparison, we have also  
32 constructed a  $\phi 29$  motor with pentameric stoichiometry by docking five pRNA and five FL-  
33 gp16 structural models into the cryo-EM density (Figure 5D, S10). The structure was then  
34 refined using molecular dynamics flexible fitting (MDFF)<sup>45</sup>. As only low-resolution cryo-

1 EM density ( $12 \text{ \AA}^{-4}$ ) is available, five-fold symmetrical restraints were imposed<sup>46</sup> throughout  
2 the refinement. Unsurprisingly, the size of the gp16-NTD ring decreases significantly from  
3  $40 \text{ \AA}$  in the hexameric model to  $26 \text{ \AA}$  in the pentameric model (Figure 5D), which would  
4 suggest full contact of the substrate DNA with the motor channel during packaging.  
5 Nevertheless, our predicted critical intermolecular interactions between CTD and pRNA  
6 remain the same for both pentameric and hexameric stoichiometry: gp16-CTD is stabilized  
7 by pRNA that bridges gp16 and the connector, and anchoring gp16-CTD to the pRNA  
8 scaffold facilitates gp16's transition between the "compact" and "extended" modes.

9

### 10 **Implication for DNA translocation mechanisms**

11

12 Several translocation mechanisms have been proposed for ring-shaped biopolymer  
13 translocating biomotors. A hand-over-hand model was originally proposed to describe how  
14 the nucleic-acid-binding loops of a planar ATPase ring in helicases move along the  
15 translocation axis during the ATP hydrolysis cycle<sup>34,36</sup>. Later, this model was extended to  
16 subunits in a non-planar ring moving along the helical axis to translocate ssDNA during  
17 DNA unwinding<sup>35,47,48</sup> or polypeptide chain during protein degradation<sup>49</sup>. In line with the  
18 hand-over-hand model, a similar inchworm model in which a multi-domain ATPase  
19 undergoes conformational changes along the substrate translocation axis was proposed for the  
20 dsDNA packaging motor gp17 in bacteriophage T4<sup>8,50</sup>. Although a push-and-roll mechanism  
21<sup>51,52</sup> has long been proposed for genome packaging in bacteriophages, previous biochemical  
22 and single-molecule experiments showed that this paradigm is not suitable for the  $\phi$ 29 DNA  
23 packaging motor<sup>53</sup>. To date, no direct structural evidence has been found supporting a rotary  
24 sequential model for the  $\phi$ 29 packaging motor. Alternatively, a sequential revolving model,  
25 in which the substrate is pushed in a circular motion into the viral procapsid without rotation  
26 of any motor components, has also been proposed<sup>37,42,54–56</sup>. In light of the recent structure of  
27 the herpesvirus terminase complex<sup>13</sup>, a much larger size of the central channel ( $39 \text{ \AA}$  in  
28 diameter) than a B-form dsDNA ( $\sim 20 \text{ \AA}$  in diameter) makes the sequential revolving model  
29 very attractive for the dsDNA packaging motors.

30 Our computational results showed that gp16 is highly dynamic with the CTD and  
31 NTD domains undergoing large displacements with respect to each other during the  
32 simulations, similar to T4<sup>8</sup>. Our complete structural model of the  $\phi$ 29 motor complex further  
33 revealed direct interactions of gp16-CTD with the scaffold pRNA, which may help anchor  
34 gp16-CTD while allowing gp16-NTD to move during packaging. Together with the possible

1 structural rearrangement of the gp16 ring, the transition between the “compact” and  
2 “extended” modes prompted us to propose a modified sequential revolving model, namely  
3 the inchworm revolving model, for  $\phi$ 29 genome packaging (Figure 6B). In this model, gp16-  
4 CTD is anchored to the “stationary” pRNA, while the movement of gp16-NTD leads to  
5 transition of gp16 between the “compact” and the “extended” modes, which provides  
6 unidirectional forces to push the substrate DNA into the viral capsid. DNA translocation is  
7 likely mediated by a transient DNA binding surface in gp16-CTD and multiple DNA  
8 interacting sites in gp16-NTD, as identified in our modeled structure. Besides the movement  
9 along the DNA translocation direction, the conformational changes of gp16 also occur in the  
10 radial direction of the gp16 ring with the “attached” mode indicating the binding of DNA to  
11 gp16-NTD and the “detached” mode denoting the unbound state. As in the original revolving  
12 mechanism<sup>42,44</sup>, the conformational changes of gp16 are coupled with ATP activities, and  
13 binding or hydrolysis of ATP shifts the binding affinity of gp16 for DNA and therefore  
14 sequentially activates individual gp16 subunits of the ATPase motor.

15 Schwartz *et al.* have shown that binding of ATP or  $\gamma$ -S-ATP (non-hydrolysable ATP)  
16 to gp16 significantly increases its binding affinity for DNA while ATP hydrolysis or adding  
17 an excess amount of ADP facilitates the release of DNA from gp16<sup>44</sup>. In our model (Figure  
18 6B), ATP binding triggers gp16 transitioning to the “extended” mode along the translocation  
19 direction in which gp16-NTD moves away from gp16-CTD that stays stationary while  
20 anchored to pRNA (Step 1, upper right). Meanwhile, the gp16 ring is in its “attached” mode  
21 in which DNA is bound to gp16-NTD with high affinity (Step 2, upper left). Subsequently,  
22 ATP hydrolysis returns gp16 to the “compact” mode, push the gp16-bound DNA into the  
23 capsid (Step 3, lower left). Finally, DNA is released from gp16 as the bound ADP shifts gp16  
24 to a low DNA binding affinity conformation (Step 4, lower right). During packaging, the  
25 anchoring of gp16-CTD to the pRNA scaffold is crucial so that the movement of gp16-NTD  
26 can be turned into a ratchet-like motion to drive DNA translocation.

27 Single-molecule experiments have provided valuable kinetic insights into how the  
28 viral packaging motors work<sup>57-59</sup>. Temporary pauses and slips of DNA translocation  
29 observed in these experiments have been used to deduce the functional states and the  
30 coordination mechanisms of the ATPase rings<sup>60-62</sup>. However, a one-way valve mechanism  
31 has also been proposed, in which besides the ATPase motor, the connector is also involved in  
32 controlling DNA translocation<sup>54,56,63</sup>. Therefore, extra caution is required to interpret kinetic  
33 results in single-molecule experiments as DNA packaging in  $\phi$ 29 is likely a combinative  
34 process of pushing (ATPase) and valving (connector).





## 1 **Conclusion**

2

3 We have performed an integrated study using X-ray structural determination and  
4 molecular modeling and simulations to elucidate the roles that the C-terminal domain of the  
5  $\phi$ 29 ATPase gp16 may play in motor assembly and genome packaging. Despite the lack of  
6 nuclease activity, the C-terminal domain is found to preserve a nucleic acid binding groove  
7 on the protein surface with an RNase H-like topology. Our structural comparison and MD  
8 simulations demonstrated that this surface site is better suited to the binding of pRNA than  
9 DNA. The C-terminal domain also possesses a transient DNA binding surface and may thus  
10 play a role in DNA translocation. Furthermore, our simulations highlighted a dynamic  
11 interplay between the N-terminal and C-terminal domains of gp16, which is dependent on the  
12 presence of pRNA. Finally, our computationally built and refined structural model of the  
13 complete  $\phi$ 29 packaging motor complex revealed molecular details of the interactions  
14 between the C-terminal domain of gp16 and pRNA, which are essential for motor assembly  
15 and function. Taken together, our results suggested a refined translocation model for the  $\phi$ 29  
16 genome packaging motor, namely the inchworm revolving mechanism, which could account  
17 for a large body of previous structural and biochemical data. Our modified mechanistic  
18 model adds a new dimension of conformational dynamics to the original revolving  
19 mechanism, and also provides a mechanical explanation for the unidirectional translocation  
20 of DNA in the motor.

21

## 1 **Materials and Methods**

2

### 3 **Cloning, expression, and purification of the C-terminal domain of gp16**

4

5 The DNA fragment encoding the gp16-CTD (residues 209–332) was amplified by  
6 PCR and inserted into the LIC site of the vector pMCSG7<sup>64</sup>. The expressed proteins are  
7 fused with an N-terminal His tag. The gp16-CTD was expressed in *E. coli* B834 (DE3) cells  
8 overnight at 16°C to an optical density at 600 nm (OD<sub>600</sub>) of 2.2. Selenomethionine gp16-  
9 CTD was prepared as described previously<sup>65</sup>. Protein expression was induced by the addition  
10 of isopropyl β-D-1-thiogalactopyranoside (IPTG) to a final concentration of 1.0 mM at an  
11 OD<sub>600</sub> of 0.59, and cells were kept to grow overnight. Cells were harvested at 5,000 rpm, 4°C,  
12 20 min, resuspended in a buffer containing 50 mM Tris-HCl (pH 8.5), 2 M NaCl, 10 mM  
13 imidazole and sonicated. Insoluble materials were sedimented by centrifugation (17,000 rpm,  
14 4°C, 30 min). Protein was purified by Ni<sup>2+</sup> affinity chromatography followed by size-  
15 exclusion chromatography on a Superdex 75 column (GE Healthcare) equilibrated in 20 mM  
16 Hepes pH 7.5, 250 mM NaCl, and 2 mM DTT.

17

### 18 **Crystallization**

19

20 Crystals were obtained by sitting drop vapor diffusion in which 0.8 μL of a  
21 selenomethionine-labeled aliquot of gp16-CTD was mixed with an equal volume of reservoir  
22 solution containing 0.1 M Bis-Tris pH 6.5, 1.8 M ammonium sulfate and 2% PEG monoethyl  
23 ether 550 as a precipitant. Crystals grew after approximately 15 days and were flash-frozen  
24 directly from the drop in liquid nitrogen for data collection at 100 K.

25

### 26 **Structure determination and refinement**

27

28 The X-ray diffraction data were collected at the Shanghai Synchrotron Radiation  
29 Facility (SSRF) beamline BL-17U1. Datasets were processed automatically by the program  
30 autoPROC<sup>66</sup>. The crystal structure of the SeMet-labeled gp16-CTD was solved by single-  
31 wavelength anomalous dispersion (SAD) method with the program AutoSol in PHENIX<sup>67</sup>.  
32 The structure was built manually using the program COOT<sup>68</sup>, and the refinement was  
33 performed with the program PHENIX using noncrystallographic symmetry restraints. The  
34 model was improved by alternating cycles of refinement. The final refinement cycles

1 included TLS refinement. The gp16-CTD crystals (residues 228-332) belong to space group  
2 P4122 with  $a = 42.68$ ,  $b = 42.48$ , and  $c = 135.86$  Å, which were solved to 2.32 Å resolution  
3 using single-wavelength anomalous dispersion data from a seleno-methionine substituted  
4 protein. Refinement statistics are summarized in Table 1.

5

## 6 **Molecular dynamics simulations**

7

8 Molecular dynamics (MD) simulations were used to generate conformational  
9 ensembles of various structural components of the  $\phi$ 29 DNA packaging motor, including  
10 gp16-CTD, linker domain of gp16, FL-gp16 with and without pRNA. We prepared the  
11 systems by solvating the solute in explicit TIP3P water molecules, with sodium and chloride  
12 ions at a final concentration of 0.15 M using the Gromacs *solvate* and *genion* tools <sup>69</sup>. 1000  
13 steps of steepest descent minimization were performed on the initial structure with all  
14 coordinates restrained except water. The system was further refined with a combination of  
15 steepest descent and conjugate gradient minimization approaches for another 5000 steps with  
16 protein backbone atoms harmonically restrained. After minimization, the system was heated  
17 to 310 K in a stepwise manner (50 K per 10 ps) using Berendsen thermostat with a coupling  
18 time constant of 0.5 ps followed by 500 ps equilibration stepwise releasing the harmonic  
19 restraints. Production runs were then carried out in NPT ensemble at 310 K and 1 atm, using  
20 velocity-rescaling thermostat <sup>70</sup> with a coupling time constant of 1 ps and Parrinello-Rahman  
21 barostat <sup>71</sup> with a coupling time constant of 2 ps. A timestep of 1 fs was used during  
22 annealing and 2 fs for equilibrium and production runs. Electrostatic interactions were  
23 calculated using the particle mesh Ewald sum method <sup>72</sup>. A cutoff of 16 Å was chosen for  
24 short-ranged van der Waals interactions. All the MD simulations were performed with  
25 Gromacs <sup>69</sup>.

26

## 27 **Structural modeling and simulations of the full-length gp16**

28

29 We built an atomic structure of the full-length pRNA based on a partial pRNA crystal  
30 structure (PDB: 4KZ2). We first completed the core part of the pRNA (base 25-95) by adding  
31 back missing nucleotides (nt) using Rosetta Stepwise application <sup>73</sup>, which utilizes a Monte  
32 Carlo-based algorithm. The first and the last 25 nt (the extended part) were then modeled  
33 using Rosetta RNA 3D Structure Modeling application. Both the core and the extended parts  
34 were individually minimized and equilibrated using MD simulations with backbone

1 phosphorus atom harmonically restrained before joining them together. Magnesium ions from  
2 the crystal structure were retained.

3 The linker domain (residues 198-227) of gp16 was built using Modeller<sup>74</sup> with the  
4 COMs of NTD and CTD separated by 60 Å. PsiPred<sup>32</sup> was used to predict the secondary  
5 structure of the linker domain as a reference. The linker domain was equilibrated in the  
6 solvent to generate an ensemble of structures with a length comparable to that inferred from  
7 the cryo-EM density (EMD-6560) (Figure S5). Ten linker domain structures were randomly  
8 chosen from the ensemble and placed in-between NTD and CTD. NTD was aligned to the  
9 HSV1 pUL15 oligomer structure (PDB: 6M5R), therefore having a relatively defined  
10 orientation. Four random orientations were taken for CTD (two with Site I facing the pRNA  
11 and two with Site II facing the pRNA). Residues 198-200 and 225-227 of the linker were  
12 then removed and re-modeled using Modeller in the presence of NTD and CTD to produce  
13 100 structures of FL-gp16. Two structures with the lowest Discrete Optimized Protein  
14 Energy (DOPE)<sup>75</sup> were chosen for each orientation of the CTD as the initial structures (eight  
15 in total) for subsequent MD simulations. To mimic the environment in the motor complex,  
16 we also performed MD simulations of FL-gp16 in the presence of pRNA. The FL-  
17 gp16/pRNA complex structures were obtained by docking the atomic structures of FL-gp16  
18 and pRNA into the cryo-EM density map. During the simulations, pRNA was restrained to its  
19 initial position, and a soft restraint of 2.5 kcal mol<sup>-1</sup> Å<sup>-2</sup> was applied if the COMs of NTD and  
20 CTD laterally deviated from their initial positions by >15 Å. Lateral displacement refers to  
21 the movement on the plane orthogonal to the NTD-CTD distance vector.

22

### 23 **Assembly and refinement of a complete structural model of the □29 motor complex**

24

25 A hexameric oligomer of FL-gp16 was built by duplicating an equilibrated structure  
26 from the simulations of the gp16-pRNA complex and aligning all NTDs to those in the  
27 pUL15 oligomer (PDB: 6M5R). The dodecameric connector structure was obtained from  
28 previous studies (PDB: 6QX7). Three orientations of the connector were generated by  
29 rotating about its central channel axis by 10° each. The connector was placed next to the  
30 hexameric gp16-pRNA oligomer according to the cryo-EM density (EMD-6560) (Figure S7).  
31 Finally, a DNA molecule was built using 3DNA<sup>76</sup> and placed inside the central channel. For  
32 comparison, a pentameric motor complex was also built in a similar fashion. The only  
33 difference is that the pentameric FL-gp16 oligomer was built by duplicating the subunit based  
34 on five-fold symmetry upon NTD alignment. Both motor complexes were solvated as

1 described in the MD simulation section and followed by simulation-based structural  
2 refinement.

3         The hexameric and pentameric systems consist of ~800,000 atoms and ~700,000  
4 atoms, respectively. In the hexameric system, all C $\alpha$  and phosphorus atoms were weakly  
5 restrained ( $1.0 \text{ kcal mol}^{-1} \text{ \AA}^{-2}$ ) to their initial positions throughout the refinement simulation.  
6 After 100,000 steps of energy minimization, the system was brought to 300 K using  
7 Berendsen thermostat in 500 ps, followed by 1 ns of restrained MD simulation. The  
8 pentameric system was refined in alignment with the previous cryo-EM density (EMD-6560)  
9 using Molecular Dynamics Flexible Fitting (MDFF)<sup>45</sup>. A five-fold symmetry has been  
10 enforced throughout the refinement<sup>46</sup>. The force scaling was chosen to be 0.1. The cross-  
11 correlation coefficient (CCC) increased from 0.55 to 0.79.

12

1

2 **ACKNOWLEDGMENTS**

3 This work was supported by National Natural Science Foundation of China (Grants no.  
4 31770948, and 31570875) to S.O., the Special Open Fund of Key Laboratory of  
5 Experimental Marine Biology, Chinese Academy of Sciences (SKF2020NO1) to S.O.,  
6 Marine Economic Development Special Fund of Fujian Province (FJHJF-L-2020-2) to S.O.,  
7 and the High-level personnel introduction grant of Fujian Normal University (Z0210509) to  
8 S.O. The diffraction data were collected by S. O. at the beamline BL-17U1 of the Shanghai  
9 Synchrotron Radiation Facility (SSRF). X.C. acknowledges the start-up fund from the  
10 College of Pharmacy and the Discovery Themes at The Ohio State University. P.G.'s Sylvan  
11 G. Frank Endowed Chair position is funded by the Chen Foundation granted to the Ohio  
12 State University. No funding from P. G. has been used for this work.

13

14

15 **Conflict of Interest**

16 P.G. is the consultant of Oxford Nanopore Technologies and Nanobio Delivery  
17 Pharmaceutical Co. Ltd, as well as the co-founder of Shenzhen P&Z Bio-medical Co. Ltd and  
18 its subsidiary US P&Z Biological Technology LLC, as well as ExonanoRNA, LLC and its  
19 subsidiary ExonanoRNA (Foshan) Biomedicine Co., Ltd.

20

**Table 1. X-ray crystallography data collection and refinement statistics.**

| <b>Dataset</b>                     | <b>gp16-CTD (residues 209-332)</b> |
|------------------------------------|------------------------------------|
| <b>Data collection</b>             |                                    |
| Beamline                           | BL-17U1, SSRF                      |
| Wavelength (Å)                     | 0.9782                             |
| Resolution range* (Å)              | 42.68-2.32 (2.44-2.32)             |
| Space group                        | <i>P</i> 4 <sub>1</sub> 22         |
| Cell dimensions                    |                                    |
| a, b, c (Å)                        | 42.68, 42.48, 135.86               |
| $\alpha$ , $\beta$ , $\gamma$ (°)  | 90.00, 90.00, 90.00                |
| Total reflections                  | 139701(20692)                      |
| Unique reflections                 | 6004 (835)                         |
| Multiplicity                       | 23.3                               |
| Completeness (%)                   | 100 (100)                          |
| Mean I/sigma(I)                    | 17.8(2.9)                          |
| Wilson B-factor                    | 52.72                              |
| R-merge                            | 0.121(1.380)                       |
| R-meas                             | 0.126(1.434)                       |
| R-pim                              | 0.034(0.387)                       |
| CC <sub>1/2</sub>                  | 0.999(0.883)                       |
| <b>Refinement</b>                  |                                    |
| Reflections used in the refinement | 5967 (575)                         |
| Reflections used for R-free        | 271 (17)                           |
| R-work                             | 0.2090 (0.2679)                    |
| R-free                             | 0.2708 (0.3068)                    |
| Number of non-hydrogen atoms       | 882                                |
| macromolecules                     | 877                                |
| solvent                            | 5                                  |
| Protein residues                   | 105                                |
| RMS(bonds)                         | 0.008                              |
| RMS(angles)                        | 0.97                               |



---

|                           |       |
|---------------------------|-------|
| Ramachandran favored (%)  | 98.06 |
| Ramachandran allowed (%)  | 1.94  |
| Ramachandran outliers (%) | 0.00  |
| Rotamer outliers (%)      | 0.00  |
| Clashscore                | 7.45  |
| Average B-factor          | 54.85 |
| macromolecules            | 54.84 |
| solvent                   | 56.57 |

---

\*Highest resolution shell is shown in parentheses

1

2 References

3

- 4 1. Guo, P., Grimes, S. & Anderson, D. A defined system for in vitro packaging of DNA-gp3 of  
5 the *Bacillus subtilis* bacteriophage 429. *Proc. Natl. Acad. Sci. USA* **5** (1986).
- 6 2. Guo, P., Peterson, C. & Anderson, D. Prohead and DNA-gp3-dependent ATPase activity  
7 of the DNA packaging protein gp16 of bacteriophage  $\phi$ 29. *Journal of Molecular Biology*  
8 **197**, 229–236 (1987).
- 9 3. Walker, J. e., Saraste, M., Runswick, M. j. & Gay, N. j. Distantly related sequences in the  
10 alpha- and beta-subunits of ATP synthase, myosin, kinases and other ATP-requiring  
11 enzymes and a common nucleotide binding fold. *The EMBO Journal* **1**, 945–951 (1982).
- 12 4. Mao, H. *et al.* Structural and Molecular Basis for Coordination in a Viral DNA Packaging  
13 Motor. *Cell Reports* **14**, 2017–2029 (2016).
- 14 5. Lee, T. J., Schwartz, C. & Guo, P. Construction of Bacteriophage Phi29 DNA Packaging  
15 Motor and its Applications in Nanotechnology and Therapy. *Annals of Biomedical*  
16 *Engineering* **37**, 2064–2081 (2009).
- 17 6. Wendell, D. *et al.* Translocation of double-stranded DNA through membrane-adapted  
18 phi29 motor protein nanopores. *Nature Nanotechnology* **4**, 765–772 (2009).
- 19 7. Burroughs, A. M., Iyer, L. M. & Aravind, L. Comparative Genomics and Evolutionary  
20 Trajectories of Viral ATP Dependent DNA-Packaging Systems. in *Genome Dynamics* (ed.  
21 Volff, J.-N.) 48–65 (KARGER, 2007). doi:10.1159/000107603.
- 22 8. Sun, S. *et al.* The Structure of the Phage T4 DNA Packaging Motor Suggests a Mechanism  
23 Dependent on Electrostatic Forces. *Cell* **135**, 1251–1262 (2008).

- 1 9. Zhao, H., Christensen, T. E., Kamau, Y. N. & Tang, L. Structures of the phage Sf6 large  
2 terminase provide new insights into DNA translocation and cleavage. *Proc Natl Acad Sci*  
3 *USA* **110**, 8075 (2013).
- 4 10. Xu, R.-G., Jenkins, H. T., Antson, A. A. & Greive, S. J. Structure of the large terminase  
5 from a hyperthermophilic virus reveals a unique mechanism for oligomerization and ATP  
6 hydrolysis. *Nucleic Acids Res* **45**, 13029–13042 (2017).
- 7 11. Hilbert, B. J. *et al.* Structure and mechanism of the ATPase that powers viral genome  
8 packaging. *Proc Natl Acad Sci USA* **112**, E3792 (2015).
- 9 12. Hilbert, B. J., Hayes, J. A., Stone, N. P., Xu, R.-G. & Kelch, B. A. The large terminase DNA  
10 packaging motor grips DNA with its ATPase domain for cleavage by the flexible nuclease  
11 domain. *Nucleic Acids Research* **45**, 3591–3605 (2017).
- 12 13. Yang, Y. *et al.* Architecture of the herpesvirus genome-packaging complex and  
13 implications for DNA translocation. *Protein Cell* **11**, 339–351 (2020).
- 14 14. Ito, J. Bacteriophage phi29 terminal protein: its association with the 5' termini of the  
15 phi29 genome. *Journal of Virology* **28**, 895–904 (1978).
- 16 15. Guo, P., Erickson, S. & Anderson, D. A small viral RNA is required for in vitro packaging of  
17 bacteriophage phi 29 DNA. *Science* **236**, 690 (1987).
- 18 16. Guo, P., Zhang, C., Chen, C., Garver, K. & Trottier, M. Inter-RNA Interaction of Phage  $\phi$ 29  
19 pRNA to Form a Hexameric Complex for Viral DNA Transportation. *Molecular Cell* **2**,  
20 149–155 (1998).
- 21 17. Zhang, F. *et al.* Function of Hexameric RNA in Packaging of Bacteriophage  $\phi$ 29 DNA In  
22 Vitro. *Molecular Cell* **2**, 141–147 (1998).
- 23 18. Cao, S. *et al.* Insights into the Structure and Assembly of the Bacteriophage  $\phi$ 29 Double-  
24 Stranded DNA Packaging Motor. *Journal of Virology* **88**, 3986–3996 (2014).

- 1 19. Morais, M. C. *et al.* Conservation of the Capsid Structure in Tailed dsDNA Bacteriophages:  
2 the Pseudoatomic Structure of  $\phi$ 29. *Molecular Cell* **18**, 149–159 (2005).
- 3 20. Xu, J., Wang, D., Gui, M. & Xiang, Y. Structural assembly of the tailed bacteriophage  $\phi$ 29.  
4 *Nature Communications* **10**, (2019).
- 5 21. Morais, M. C. *et al.* Cryoelectron-Microscopy Image Reconstruction of Symmetry  
6 Mismatches in Bacteriophage  $\phi$ 29. *Journal of Structural Biology* **135**, 38–46 (2001).
- 7 22. Morais, M. C. *et al.* Defining Molecular and Domain Boundaries in the Bacteriophage  
8  $\phi$ 29 DNA Packaging Motor. *Structure* **16**, 1267–1274 (2008).
- 9 23. Simpson, A. A. *et al.* Structure of the bacteriophage  $\phi$ 29 DNA packaging motor. *Nature*  
10 **408**, 6 (2000).
- 11 24. Trottier, M. & Guo, P. Approaches to determine stoichiometry of viral assembly  
12 components. *Journal of Virology* **71**, 487–494 (1997).
- 13 25. Ibarra, B. *et al.* Topology of the components of the DNA packaging machinery in the  
14 phage  $\phi$ 29 prohead. *Journal of Molecular Biology* **298**, 807–815 (2000).
- 15 26. Daudén, M. I. *et al.* Large Terminase Conformational Change Induced by Connector  
16 Binding in Bacteriophage T7. *Journal of Biological Chemistry* **288**, 16998–17007 (2013).
- 17 27. Nowotny, M., Gaidamakov, S. A., Crouch, R. J. & Yang, W. Crystal Structures of RNase H  
18 Bound to an RNA/DNA Hybrid: Substrate Specificity and Metal-Dependent Catalysis. *Cell*  
19 **121**, 1005–1016 (2005).
- 20 28. Nowotny, M. *et al.* Structure of Human RNase H1 Complexed with an RNA/DNA Hybrid:  
21 Insight into HIV Reverse Transcription. *Molecular Cell* **28**, 264–276 (2007).
- 22 29. Beese, L. S. & Steitz, T. A. Structural basis for the 3'→5' exonuclease activity of  
23 Escherichia coli DNA polymerase I: a two metal ion mechanism. *The EMBO Journal* **10**,  
24 25–33 (1991).

- 1 30. Górecka, K. M. *et al.* RuvC uses dynamic probing of the Holliday junction to achieve  
2 sequence specificity and efficient resolution. *Nature Communications* **10**, 1–10 (2019).
- 3 31. Himmel, D. M. *et al.* Structure of HIV-1 Reverse Transcriptase with the Inhibitor  $\beta$ -  
4 Thujaplicinol Bound at the RNase H Active Site. *Structure* **17**, 1625–1635 (2009).
- 5 32. McGuffin, L. J., Bryson, K. & Jones, D. T. The PSIPRED protein structure prediction server.  
6 *Bioinformatics* **16**, 404–405 (2000).
- 7 33. Noji, H., Yasuda, R., Yoshida, M. & Kinosita, K. Direct observation of the rotation of F1-  
8 ATPase. *Nature* **386**, 299–302 (1997).
- 9 34. Enemark, E. J. & Joshua-Tor, L. Mechanism of DNA translocation in a replicative  
10 hexameric helicase. *Nature* **442**, 270–275 (2006).
- 11 35. Itsathitphaisarn, O., Wing, R. A., Eliason, W. K., Wang, J. & Steitz, T. A. The Hexameric  
12 Helicase DnaB Adopts a Nonplanar Conformation during Translocation. *Cell* **151**, 267–  
13 277 (2012).
- 14 36. Thomsen, N. D. & Berger, J. M. Running in Reverse: The Structural Basis for  
15 Translocation Polarity in Hexameric Helicases. *Cell* **139**, 523–534 (2009).
- 16 37. Schwartz, C., De Donatis, G. M., Fang, H. & Guo, P. The ATPase of the phi29 DNA  
17 packaging motor is a member of the hexameric AAA+ superfamily. *Virology* **443**, 20–27  
18 (2013).
- 19 38. Lee, T.-J. & Guo, P. Interaction of gp16 with pRNA and DNA for Genome Packaging by  
20 the Motor of Bacterial Virus phi29. *Journal of Molecular Biology* **356**, 589–599 (2006).
- 21 39. Xiao, F., Moll, W.-D., Guo, S. & Guo, P. Binding of pRNA to the N-terminal 14 amino acids  
22 of connector protein of bacteriophage phi29. *Nucleic Acids Research* **33**, 2640–2649  
23 (2005).

- 1 40. Valle, M. *et al.* Domain architecture of the bacteriophage  $\Phi$ 29 connector  
2 protein11Edited by W. Baumeister. *Journal of Molecular Biology* **288**, 899–909 (1999).
- 3 41. Ding, F. *et al.* Structure and assembly of the essential RNA ring component of a viral  
4 DNA packaging motor. *Proc Natl Acad Sci USA* **108**, 7357 (2011).
- 5 42. Schwartz, C., De Donatis, G. M., Zhang, H., Fang, H. & Guo, P. Revolution rather than  
6 rotation of AAA+ hexameric phi29 nanomotor for viral dsDNA packaging without coiling.  
7 *Virology* **443**, 28–39 (2013).
- 8 43. Shu, D., Zhang, H., Jin, J. & Guo, P. Counting of six pRNAs of phi29 DNA-packaging motor  
9 with customized single-molecule dual-view system. *The EMBO Journal* **26**, 527–537  
10 (2007).
- 11 44. Schwartz, C., Fang, H., Huang, L. & Guo, P. Sequential action of ATPase, ATP, ADP, Pi and  
12 dsDNA in procapsid-free system to enlighten mechanism in viral dsDNA packaging.  
13 *Nucleic Acids Research* **40**, 2577–2586 (2012).
- 14 45. Trabuco, L. G., Villa, E., Mitra, K., Frank, J. & Schulten, K. Flexible Fitting of Atomic  
15 Structures into Electron Microscopy Maps Using Molecular Dynamics. *Structure* **16**, 673–  
16 683 (2008).
- 17 46. Chan, K.-Y. *et al.* Symmetry-Restrained Flexible Fitting for Symmetric EM Maps.  
18 *Structure* **19**, 1211–1218 (2011).
- 19 47. Gao, Y. *et al.* Structures and operating principles of the replisome. *Science* **363**,  
20 eaav7003 (2019).
- 21 48. Thomsen, N. D., Lawson, M. R., Witkowsky, L. B., Qu, S. & Berger, J. M. Molecular  
22 mechanisms of substrate-controlled ring dynamics and substepping in a nucleic acid-  
23 dependent hexameric motor. *Proceedings of the National Academy of Sciences* **113**,  
24 E7691–E7700 (2016).

- 1 49. Gates, S. N. *et al.* Ratchet-like polypeptide translocation mechanism of the AAA+  
2 disaggregase Hsp104. *Science* **357**, 273–279 (2017).
- 3 50. Draper, B. & Rao, V. B. An ATP Hydrolysis Sensor in the DNA Packaging Motor from  
4 Bacteriophage T4 Suggests an Inchworm-Type Translocation Mechanism. *Journal of*  
5 *Molecular Biology* **369**, 79–94 (2007).
- 6 51. Hendrix, R. W. Symmetry mismatch and DNA packaging in large bacteriophages.  
7 *Proceedings of the National Academy of Sciences* **75**, 4779–4783 (1978).
- 8 52. Yu, J., Moffitt, J., Hetherington, C. L., Bustamante, C. & Oster, G. Mechanochemistry of a  
9 Viral DNA Packaging Motor. *Journal of Molecular Biology* **400**, 186–203 (2010).
- 10 53. Hugel, T. *et al.* Experimental Test of Connector Rotation during DNA Packaging into  
11 Bacteriophage  $\phi$ 29 Capsids. *PLoS Biology* **5**, e59 (2007).
- 12 54. Fang, H., Jing, P., Haque, F. & Guo, P. Role of Channel Lysines and the “Push Through a  
13 One-Way Valve” Mechanism of the Viral DNA Packaging Motor. *Biophysical Journal* **102**,  
14 127–135 (2012).
- 15 55. Schwartz, C. & Guo, P. Ultrastable pRNA hexameric ring gearing hexameric phi29 DNA-  
16 packaging motor by revolving without rotating and coiling. *Current Opinion in*  
17 *Biotechnology* **24**, 581–590 (2013).
- 18 56. Zhao, Z., Khisamutdinov, E., Schwartz, C. & Guo, P. Mechanism of One-Way Traffic of  
19 Hexameric Phi29 DNA Packaging Motor with Four Electropositive Relaying Layers  
20 Facilitating Antiparallel Revolution. *ACS Nano* **7**, 4082–4092 (2013).
- 21 57. Liu, S. *et al.* A Viral Packaging Motor Varies Its DNA Rotation and Step Size to Preserve  
22 Subunit Coordination as the Capsid Fills. *Cell* **157**, 702–713 (2014).
- 23 58. Moffitt, J. R. *et al.* Intersubunit coordination in a homomeric ring ATPase. *Nature* **457**,  
24 446–450 (2009).

- 1 59. Tafoya, S. *et al.* Molecular switch-like regulation enables global subunit coordination in a  
2 viral ring ATPase. *Proceedings of the National Academy of Sciences* **115**, 7961–7966  
3 (2018).
- 4 60. Aathavan, K. *et al.* Substrate interactions and promiscuity in a viral DNA packaging  
5 motor. *Nature* **461**, 669–673 (2009).
- 6 61. Chemla, Y. R. *et al.* Mechanism of Force Generation of a Viral DNA Packaging Motor. *Cell*  
7 **122**, 683–692 (2005).
- 8 62. Smith, D. E. *et al.* The bacteriophage  $\phi$ 29 portal motor can package DNA against a large  
9 internal force. *Nature* **413**, 748–752 (2001).
- 10 63. Jing, P., Haque, F., Shu, D., Montemagno, C. & Guo, P. One-Way Traffic of a Viral Motor  
11 Channel for Double-Stranded DNA Translocation. *Nano Letters* **10**, 3620–3627 (2010).
- 12 64. Eschenfeldt, W. H., Lucy, S., Millard, C. S., Joachimiak, A. & Mark, I. D. A Family of LIC  
13 Vectors for High-Throughput Cloning and Purification of Proteins. in *High Throughput*  
14 *Protein Expression and Purification: Methods and Protocols* (ed. Doyle, S. A.) 105–115  
15 (Humana Press, 2009). doi:10.1007/978-1-59745-196-3\_7.
- 16 65. Gan, N. *et al.* Regulation of phosphoribosyl ubiquitination by a calmodulin-dependent  
17 glutamylase. *Nature* **572**, 387–391 (2019).
- 18 66. Vonrhein, C. *et al.* Data processing and analysis with the *autoPROC* toolbox. *Acta*  
19 *Crystallographica Section D Biological Crystallography* **67**, 293–302 (2011).
- 20 67. Adams, P. D. *et al.* PHENIX: a comprehensive Python-based system for macromolecular  
21 structure solution. *Acta Crystallographica Section D Biological Crystallography* **66**, 213–  
22 221 (2010).
- 23 68. Emsley, P. & Cowtan, K. Coot: model-building tools for molecular graphics. *Acta*  
24 *Crystallographica Section D Biological Crystallography* **60**, 2126–2132 (2004).



- 1 69. Abraham, M. J. *et al.* GROMACS: High performance molecular simulations through  
2 multi-level parallelism from laptops to supercomputers. *SoftwareX* **1–2**, 19–25 (2015).
- 3 70. Bussi, G., Donadio, D. & Parrinello, M. Canonical sampling through velocity rescaling.  
4 *Journal of Chemical Physics* **126**, 014101 (2007).
- 5 71. Parrinello, M. & Rahman, A. Polymorphic transitions in single crystals: A new molecular  
6 dynamics method. *Journal of Applied Physics* **52**, 7182–7190 (1981).
- 7 72. Darden, T., York, D. & Pedersen, L. Particle mesh Ewald: An  $N \cdot \log(N)$  method for Ewald  
8 sums in large systems. *The Journal of Chemical Physics* **98**, 10089 (1993).
- 9 73. Das, R. & Baker, D. Automated de novo prediction of native-like RNA tertiary structures.  
10 *Proceedings of the National Academy of Sciences* **104**, 14664–14669 (2007).
- 11 74. Eswar, N., Eramian, D., Webb, B., Shen, M.-Y. & Sali, A. Protein Structure Modeling with  
12 MODELLER. in *Structural Proteomics: High-Throughput Methods* (eds. Kobe, B., Guss, M.  
13 & Huber, T.) 145–159 (Humana Press, 2008). doi:10.1007/978-1-60327-058-8\_8.
- 14 75. Shen, M. & Sali, A. Statistical potential for assessment and prediction of protein  
15 structures. *Protein Science* **15**, 2507–2524 (2006).
- 16 76. Lu, X.-J. 3DNA: a software package for the analysis, rebuilding and visualization of three-  
17 dimensional nucleic acid structures. *Nucleic Acids Research* **31**, 5108–5121 (2003).
- 18
- 19

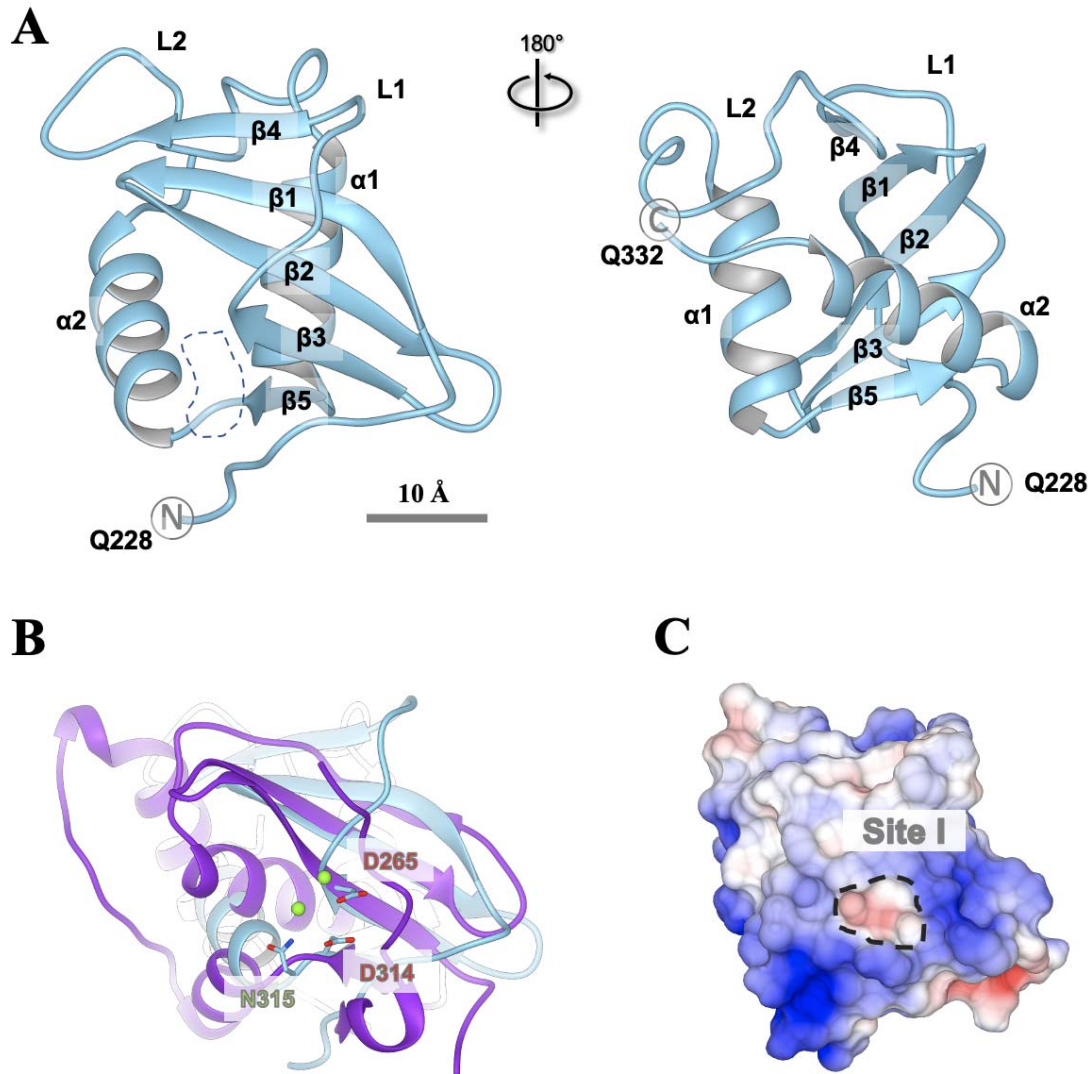

1  
2 **Figure 1.** X-ray crystallographic structure of the gp16 C-terminal domain (gp16-CTD). (A)  
3 Cartoon diagrams of gp16-CTD.  $\alpha$  helices and  $\beta$  strands are labeled and numbered. The  
4 analogue active site (Site I) is circled by dotted line. (B) Superposition of gp16-CTD  
5 (colored in cyan) with RNase H1 (colored in purple; PDB: 1ZBI). Charged residues at Site I  
6 of gp16-CTD are labeled and shown as sticks. Magnesium ions from the crystallographic  
7 structure of RNase H1 are shown in green spheres. (C) Electrostatic surface of gp16-CTD.  
8 Positive and negative charges are colored in blue and red, respectively. Site I is circled by  
9 dotted line.  
10

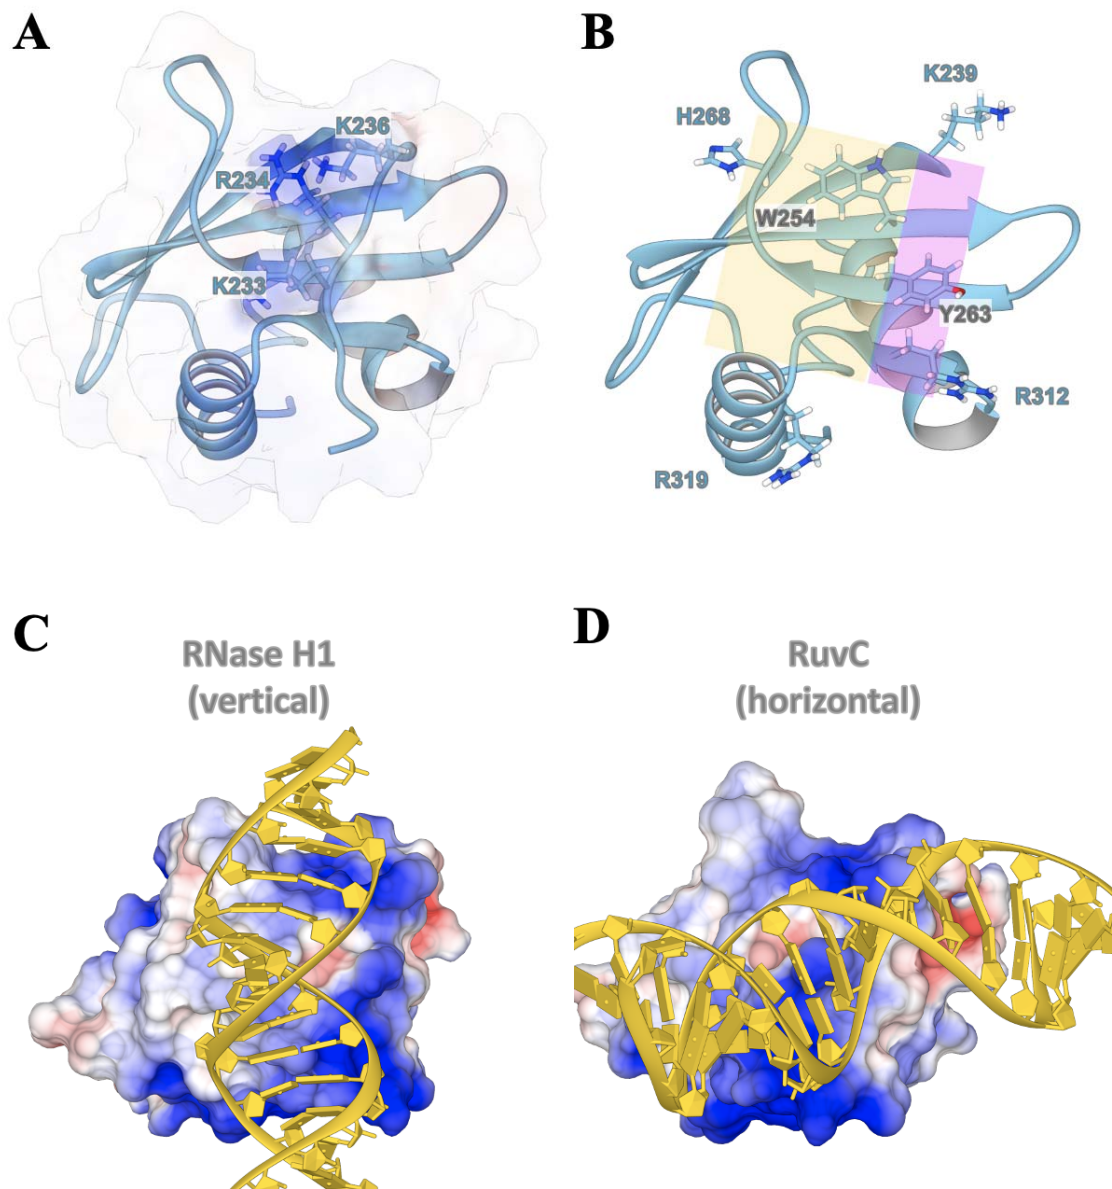

1  
2 **Figure 2.** The analogous active site suggests a nucleic acid binding surface for gp16-CTD.  
3 (A) Charged residues on the N-terminus of gp16-CTD form a positively charged surface.  
4 Charged residues are labeled and shown as sticks. (B) Two binding surfaces separated by the  
5 N-terminus of gp16-CTD. The major and the minor binding surfaces are colored in yellow  
6 and magenta, respectively. Charged residues surrounding the surface and hydrophobic  
7 residues at the center of the surface are labeled and shown as sticks. For clarity, the N-  
8 terminus is not shown. (C) Superposition of gp16-CTD with two RNase H-like domains  
9 suggested two potential DNA binding orientations (vertical and horizontal) near Site I of  
10 gp16-CTD.  
11

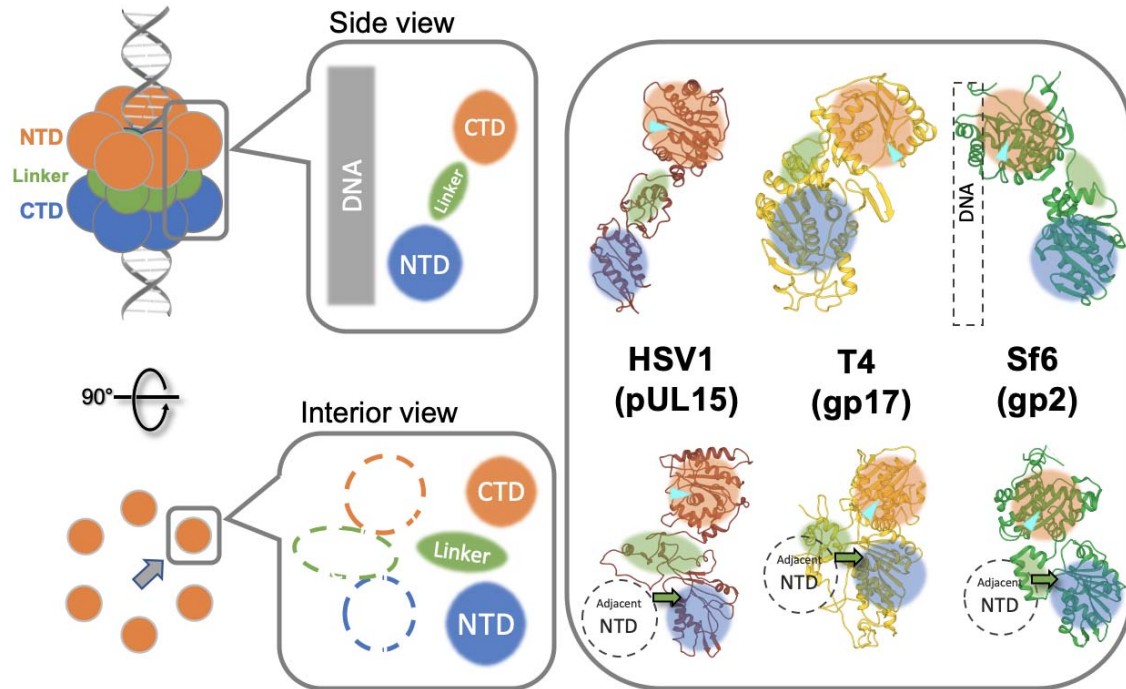

1

2 **Figure 3.** Structural superposition of several viral packaging motor proteins according to  
3 their ATPase domains (NTD). CTD, linker and NTD are indicated by orange, green and blue  
4 circles, respectively. The nuclease active sites on CTD are indicated by cyan triangles. Two  
5 views are shown. The side view (above) refers to a cross-section view along the DNA  
6 translocation axis. The interior view (below) refers to viewing from the interior of the central  
7 channel along the radial axis.

8

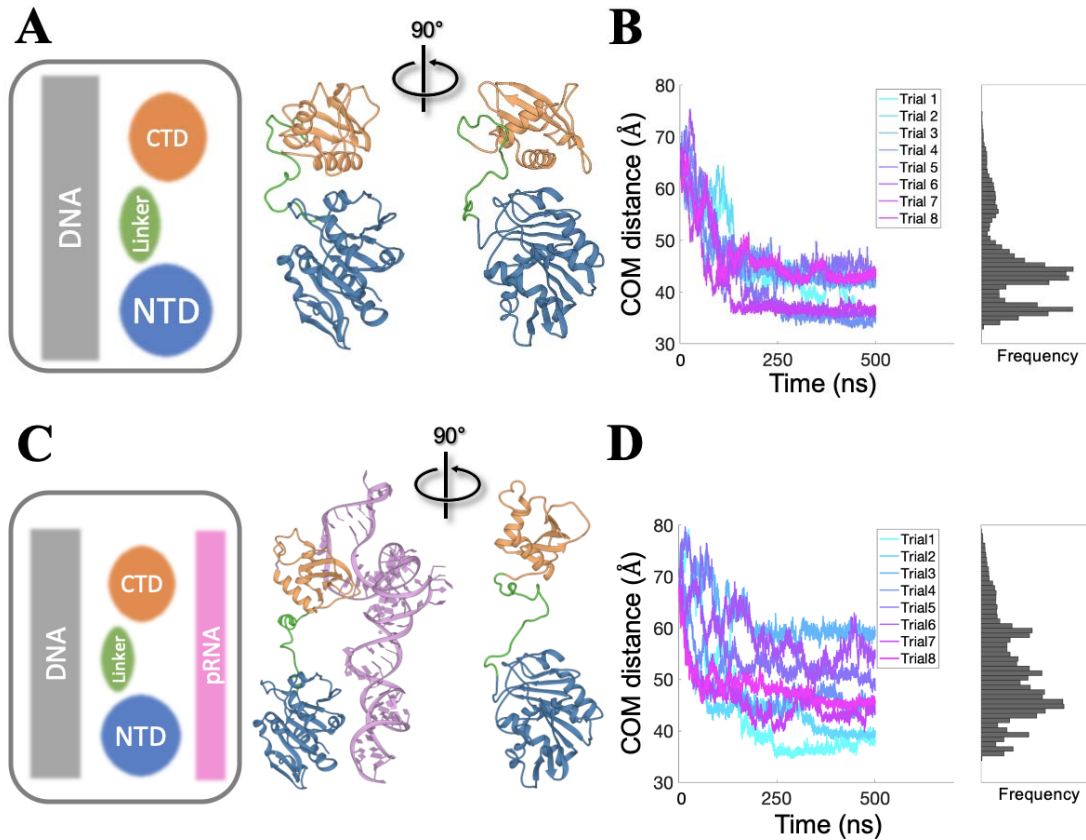

1  
2  
3  
4  
5  
6  
7  
8  
9  
10

**Figure 4.** Investigating the dynamic interaction between NTD and CTD in the presence and the absence of pRNA with molecular dynamics (MD) simulations. (A) Simulation setup in the absence of pRNA and a snapshot of FL-gp16 in the compact mode. (B) Center-of-mass (COM) distances between NTD and CTD as a function of time during the simulations of FL-gp16 alone. (C) Simulation setup in the presence of pRNA and a snapshot of FL-gp16 in the extended mode. (D) COM distances between NTD and CTD as a function of time during the simulations of the FL-gp16/pRNA complex. Panel on the right shows the histogram of the sampled distances during the simulations.

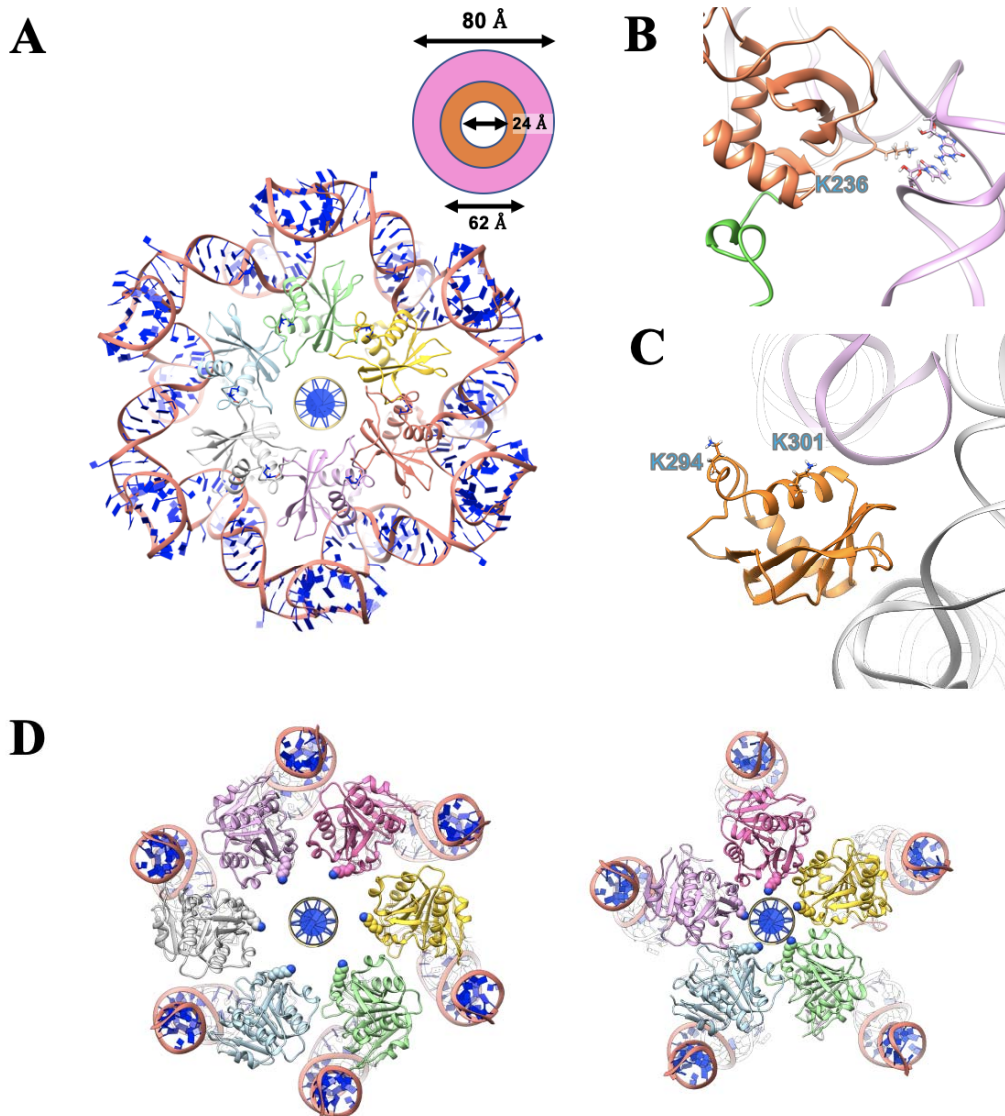

1  
2 **Figure 5.** Construction of ring-shaped gp16 oligomers. (A) A hexameric ring of gp16-CTD  
3 and pRNA. Subunits are colored in green, yellow, red, purple, light blue and gray,  
4 respectively. pRNA bases are colored in blue and the backbone is colored in pink. A DNA  
5 molecule is placed at the center of the channel showing the relative size of the channel. (B)  
6 Interaction between the CTD (colored in orange) and the pRNA (colored in pink). The linker  
7 domain (partially shown) is colored in green. Interacting residues are labeled and shown as  
8 sticks. (C) Interaction between the CTD (colored in orange) and the adjacent pRNA (colored  
9 in gray). Interacting residues are labeled and shown as sticks. (D) A hexameric (left) and  
10 pentameric (right) ring of gp16-NTD. Similarly, subunits are colored in green, yellow, red,  
11 purple, light blue and gray (only in hexamer), respectively. K56 is shown as spheres in the  
12 color of the respective subunit.

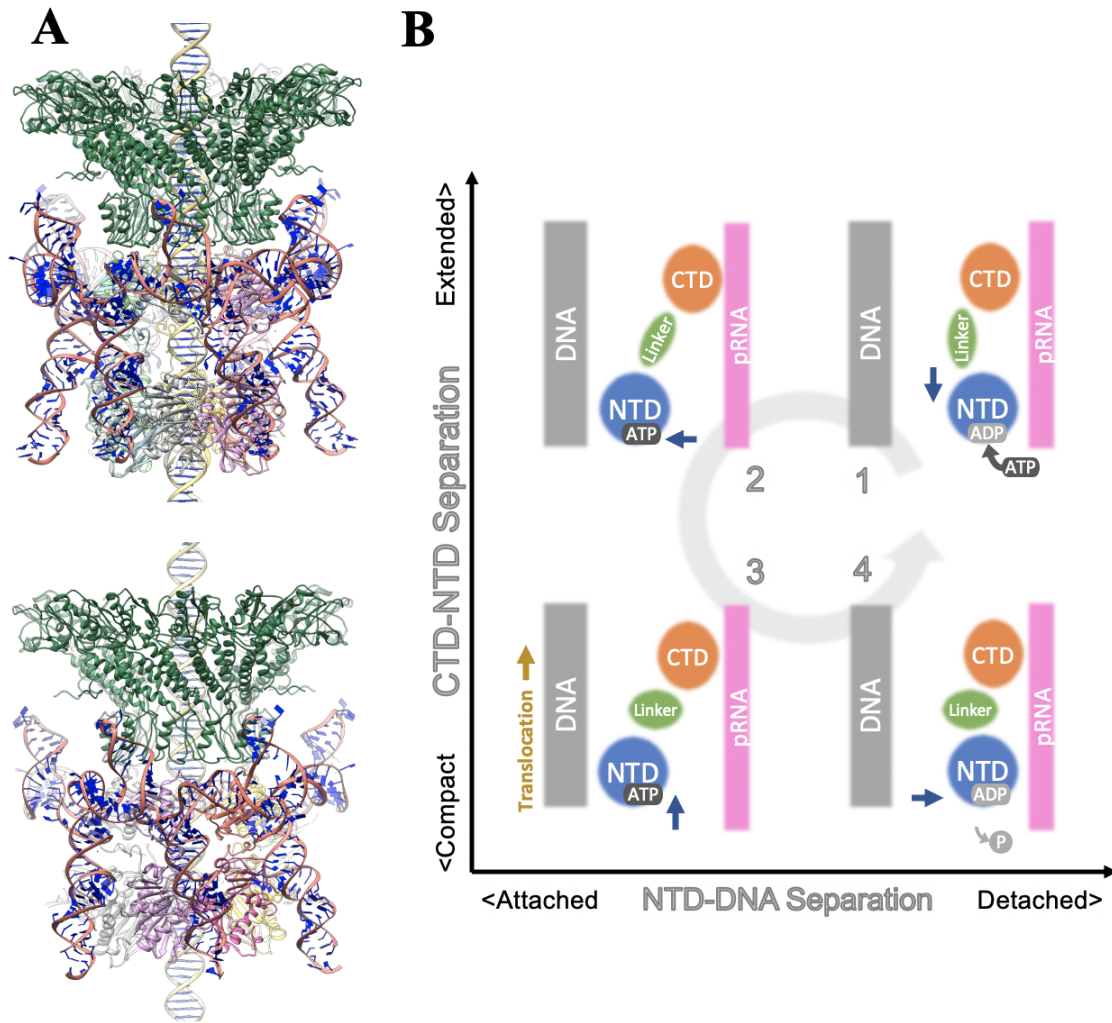

1  
2 **Figure 6.** A hexameric structural model of the  $\phi$ 29 DNA packaging motor complex and its  
3 implication for DNA translocation mechanism. (A) Snapshots of the motor complex with  
4 NTD in the “extended” mode (above) and the “compact” mode (below). The connector is  
5 colored in dark green. (B) Schematic of the inchworm revolving mechanism. The horizontal  
6 axis represents the NTD-DNA interaction: bound (attached; left) and unbound (detached;  
7 right) states. The vertical axis represents the NTD-CTD interaction: bound (compact; lower)  
8 and unbound (extended; upper) states. Motions of the NTD are indicated by blue arrows.  
9 Direction of the DNA translocation is indicated by yellow arrow.

10
